# Supplementary material for: Organic Nanovesicular Cargoes for Sustained Drug Delivery: Synthesis, Vesicle Formation, Controlling “Pearling” States, and Terfenadine Loading/Release Studies
Source: Hindawi journal article supplement (doi:10.1155/2014/369139), 2014-01-01
Supplement: f1 [file 369139.f1.pdf]

# SUPPORTING INFORMATION

## Organic Nano-Vesicular Cargoes for Drug Delivery: Synthesis, Self-assembly, Controlling Vesicles Fusion and Terfenadine Loading/Release Studies

Ajay Kumar Botcha,<sup>a</sup> Balakrishna Dulla,<sup>b</sup> E. Ramanjaneya Reddy,<sup>b</sup> Keerthana Sarma Chennubhotla,<sup>c</sup>  
Pushkar Kulkarni,<sup>c\*</sup> Rajadurai Chandrasekar<sup>a\*</sup> and Marina S. Rajadurai<sup>b\*</sup>

<sup>a</sup>*School of Chemistry, University of Hyderabad,  
Prof. C. R. Rao Road, Gachibowli  
Hyderabad-500 046, INDIA*

*Fax: +91(40)23134824; Tel: +91(40)23134824;*

*Corresponding author: E-mail: rcsc@uohyd.ernet.in or [chandrasedkar100@yahoo.com](mailto:chandrasedkar100@yahoo.com)*

<sup>b</sup>*Organic & Medicinal Chemistry, Dr. Reddy's Institute of Life Sciences  
University of Hyderabad Campus  
Hyderabad-500046, INDIA*

*Corresponding author: Email: [MarinaR@drils.org](mailto:MarinaR@drils.org)*

<sup>c</sup>*Zephase Therapeutics and Biology Department,  
Dr. Reddy's Institute of Life Sciences  
University of Hyderabad Campus  
Gachibowli, Hyderabad-500 046, INDIA*

*Email: [pushkark@drils.org](mailto:pushkark@drils.org), [kk.pushkar@gmail.com](mailto:kk.pushkar@gmail.com)*

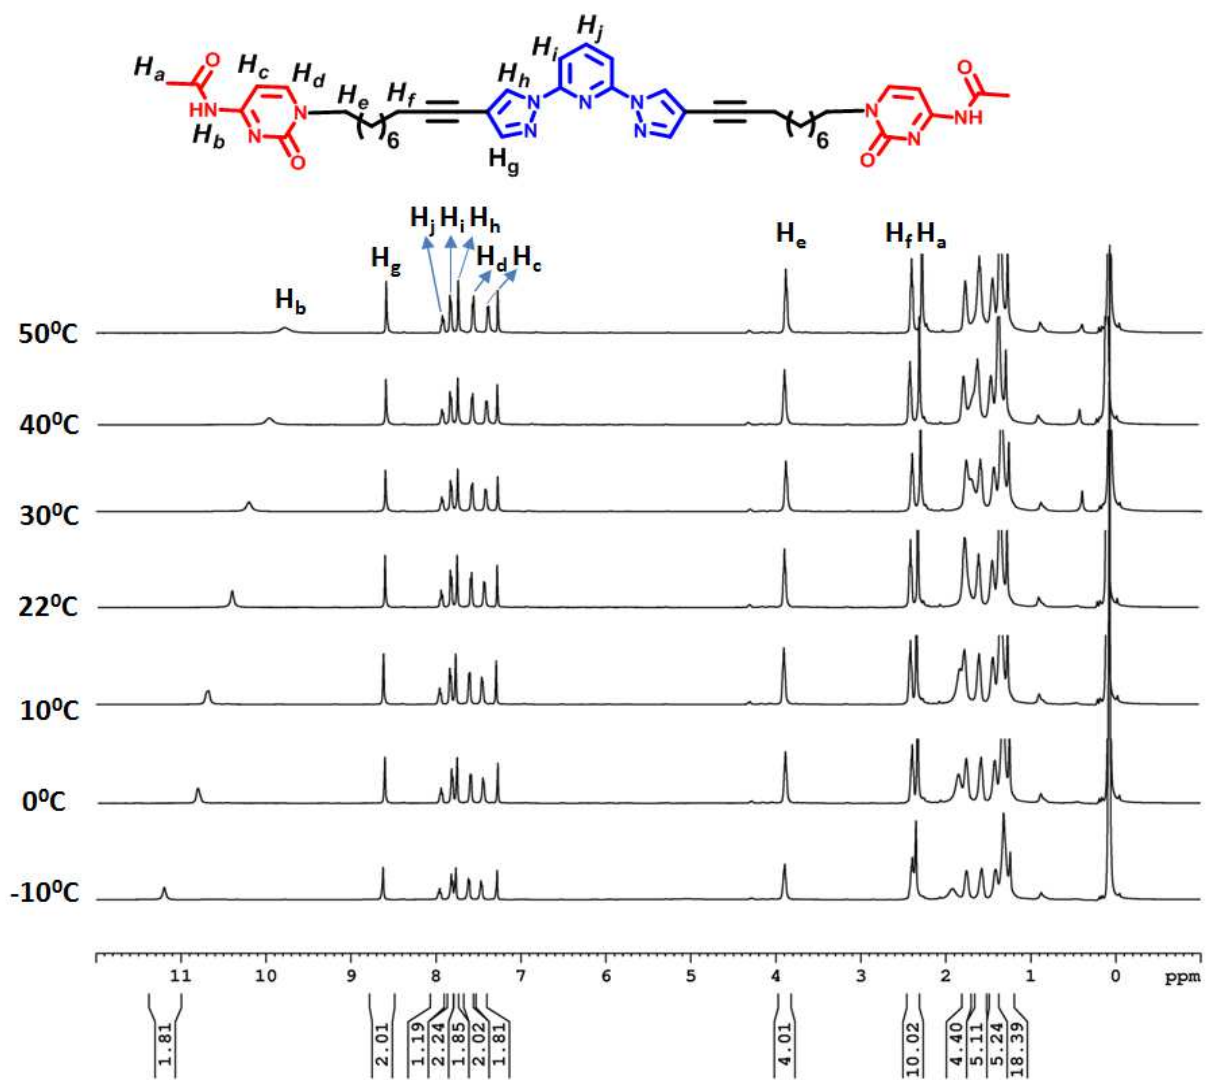

**Figure S1** | Variable temperature  $^1\text{H-NMR}$  studies of **1** in  $\text{CDCl}_3$ .
